# Supplementary material
Source: Springer Nature journal article supplement (https://www.springermedizin.de/resource/supplementary/13054_2010_8771_MOESM2_ESM.pdf/9732528)

Type of recommendations

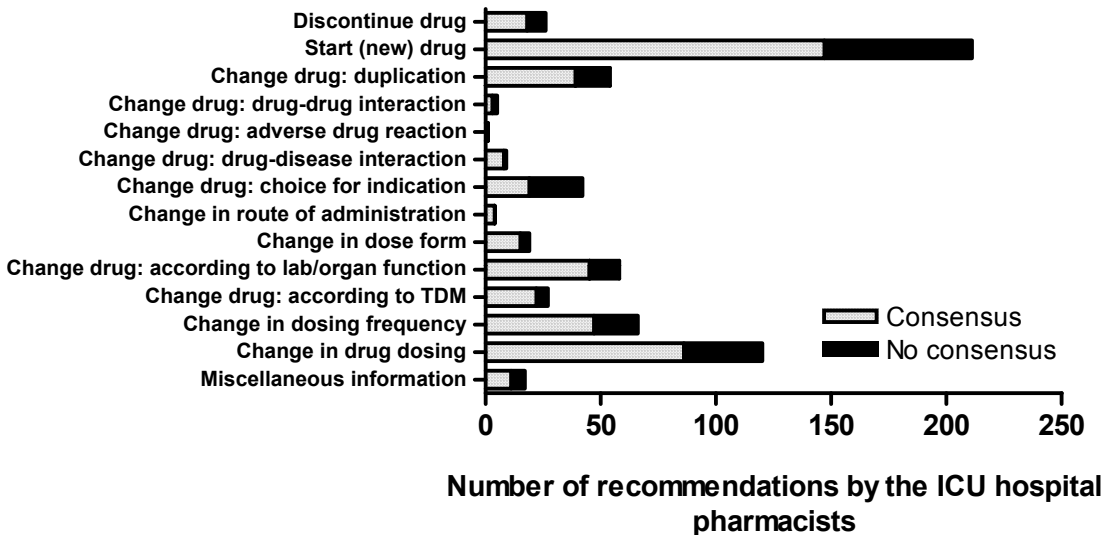

Supplement: MOESM2 [file 9732528]
